# Supplementary material for: Removal of Pesticides from Waters by Adsorption: Comparison between Synthetic Zeolites and Mesoporous Silica Materials. A Review
Source: MDPI journal article supplement (doi:10.3390/ma14133532), 2021-06-24
Supplement: s1 [file s1]

Supplementary materials

# Removal of Pesticides from Waters by Adsorption: Comparison between Synthetic Zeolites and Mesoporous Silica Materials. A Review

Magdalena Andrunik \*, Tomasz Bajda

Faculty of Geology, Geophysics and Environmental Protection, AGH University of Science and Technology, al. Mickiewicza 30, 30-059 Krakow, Poland; bajda@agh.edu.pl

\* Correspondence: magtuch@agh.edu.pl; Tel.: (48)(12) 888 45 83

**Citation:** Andrunik, M.; Bajda, T. Removal of Pesticides from Waters by Adsorption: Comparison between Synthetic Zeolites and Mesoporous Silica Materials. A Review. *Materials* **2021**, *14*, 3532. <https://doi.org/10.3390/ma14133532>

Academic Editor: José Rodríguez-Mirasol

Received: 26 May 2021

Accepted: 23 June 2021

Published: 24 June 2021

**Publisher's Note:** MDPI stays neutral with regard to jurisdictional claims in published maps and institutional affiliations.

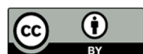

**Copyright:** © 2021 by the author. Licensee MDPI, Basel, Switzerland. This article is an open access article distributed under the terms and conditions of the Creative Commons Attribution (CC BY) license (<http://creativecommons.org/licenses/by/4.0/>).

MCM-41

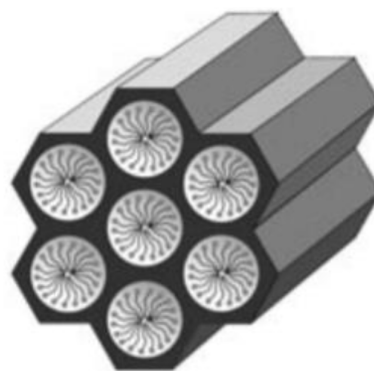

MCM-48

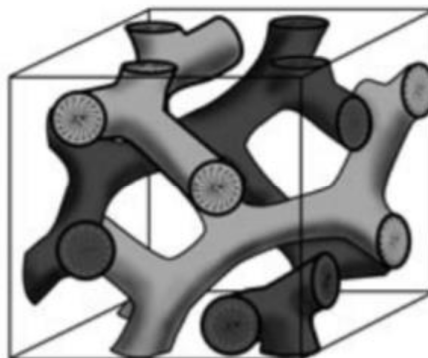

SBA-15

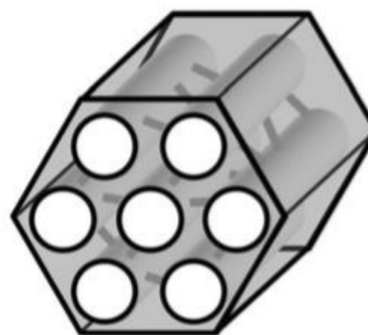

**Figure S1.** Structures of mesoporous silica materials.

BEA

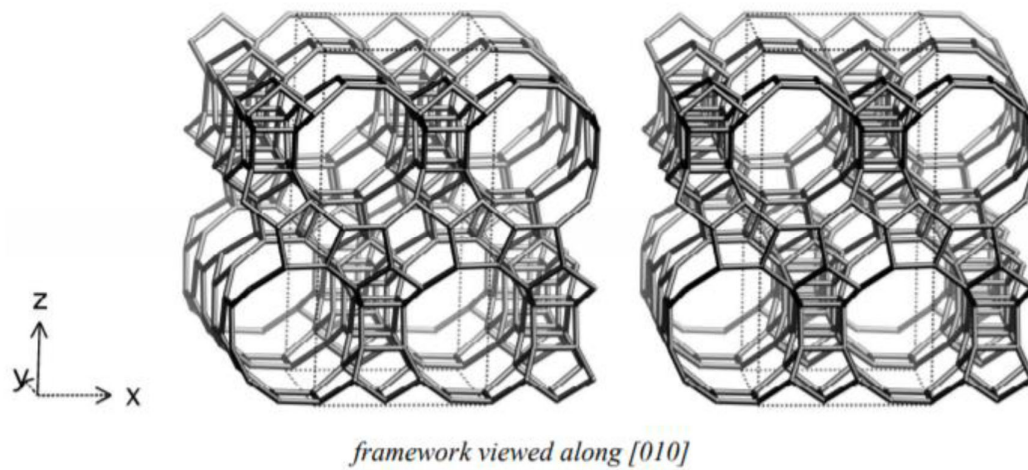

FAU

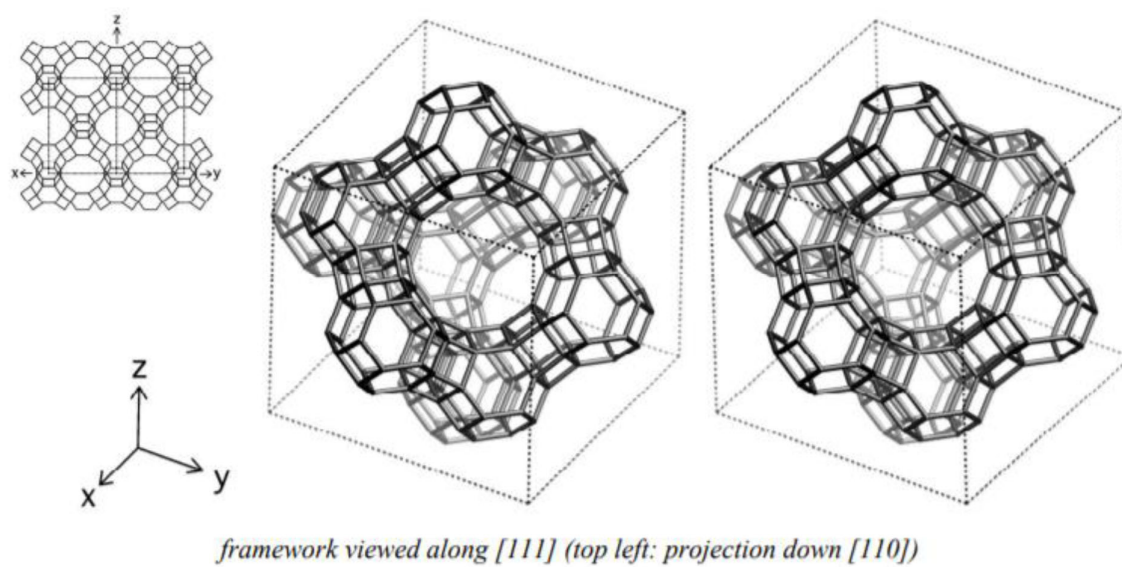

LTA

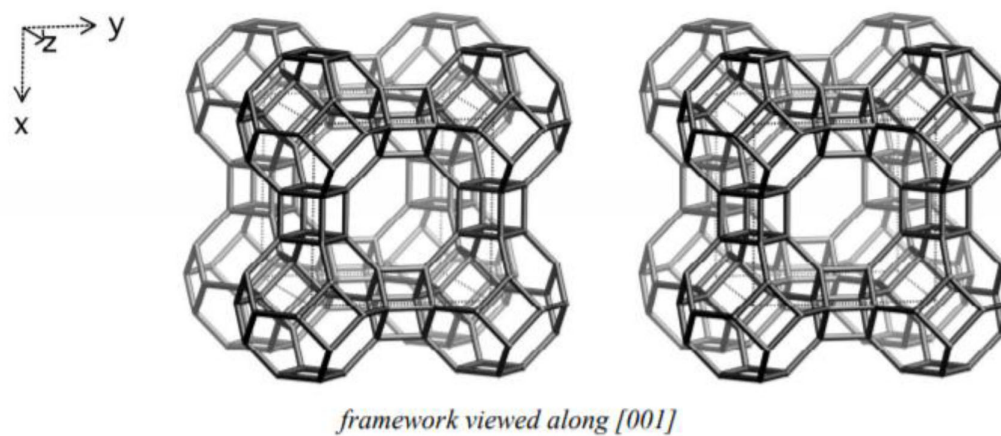

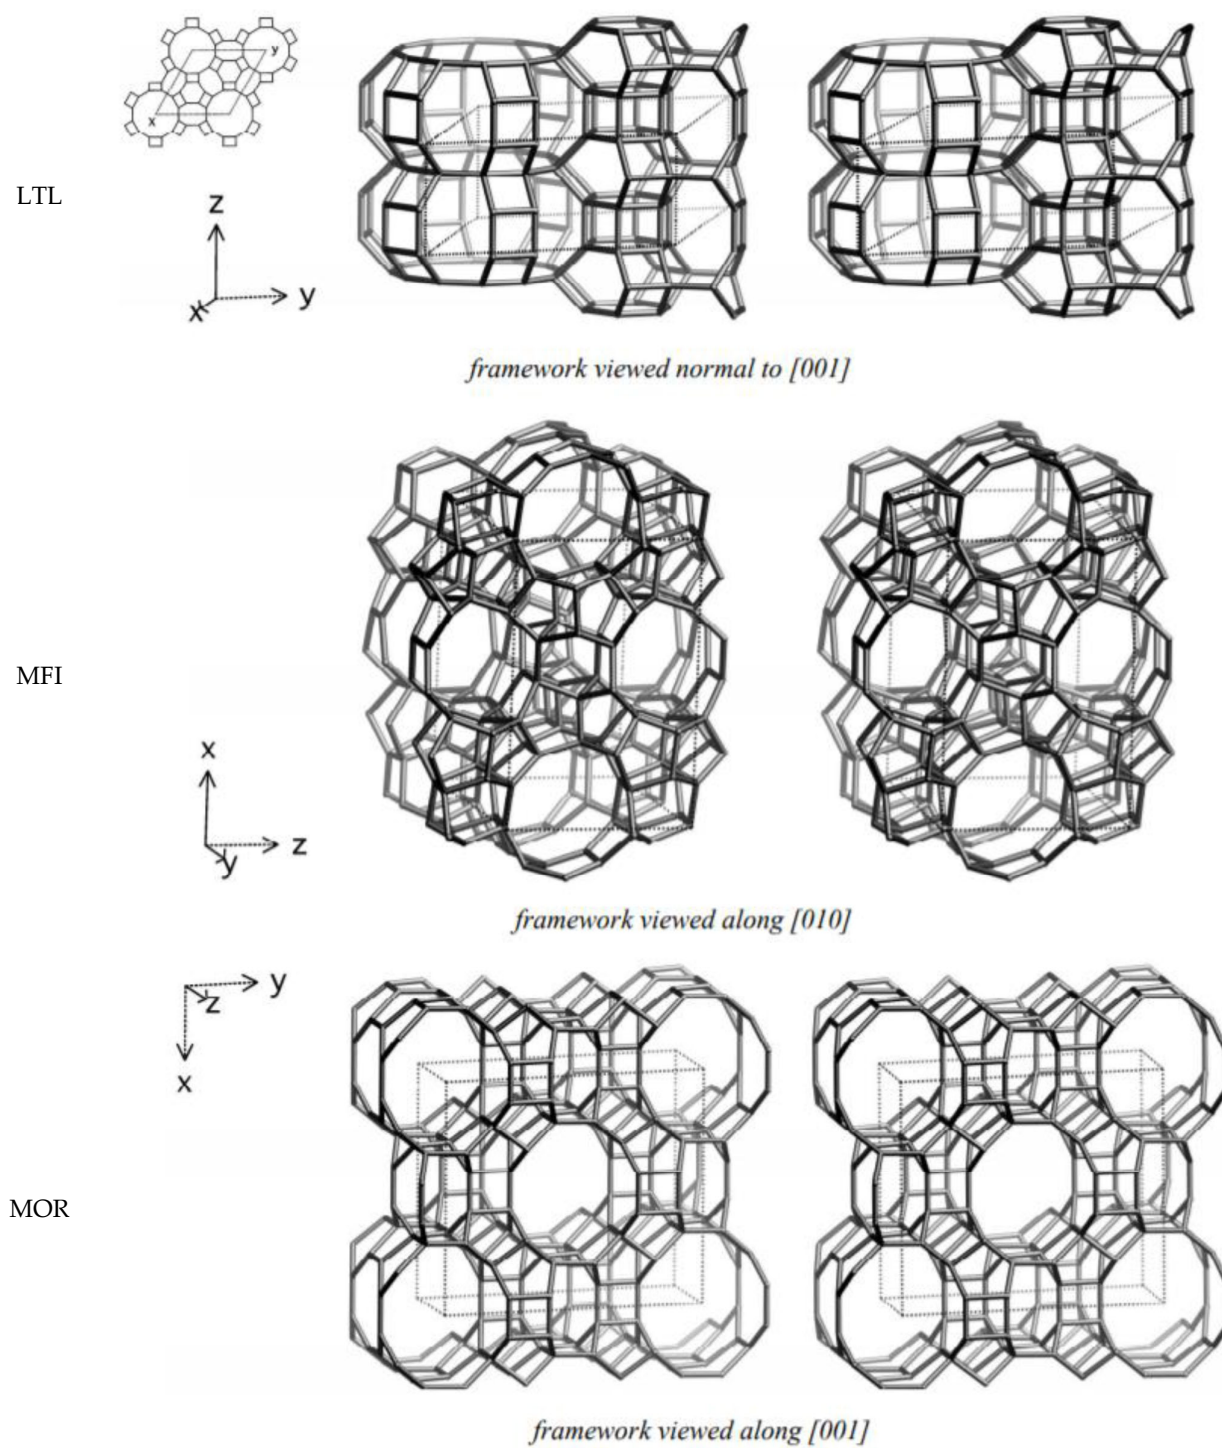

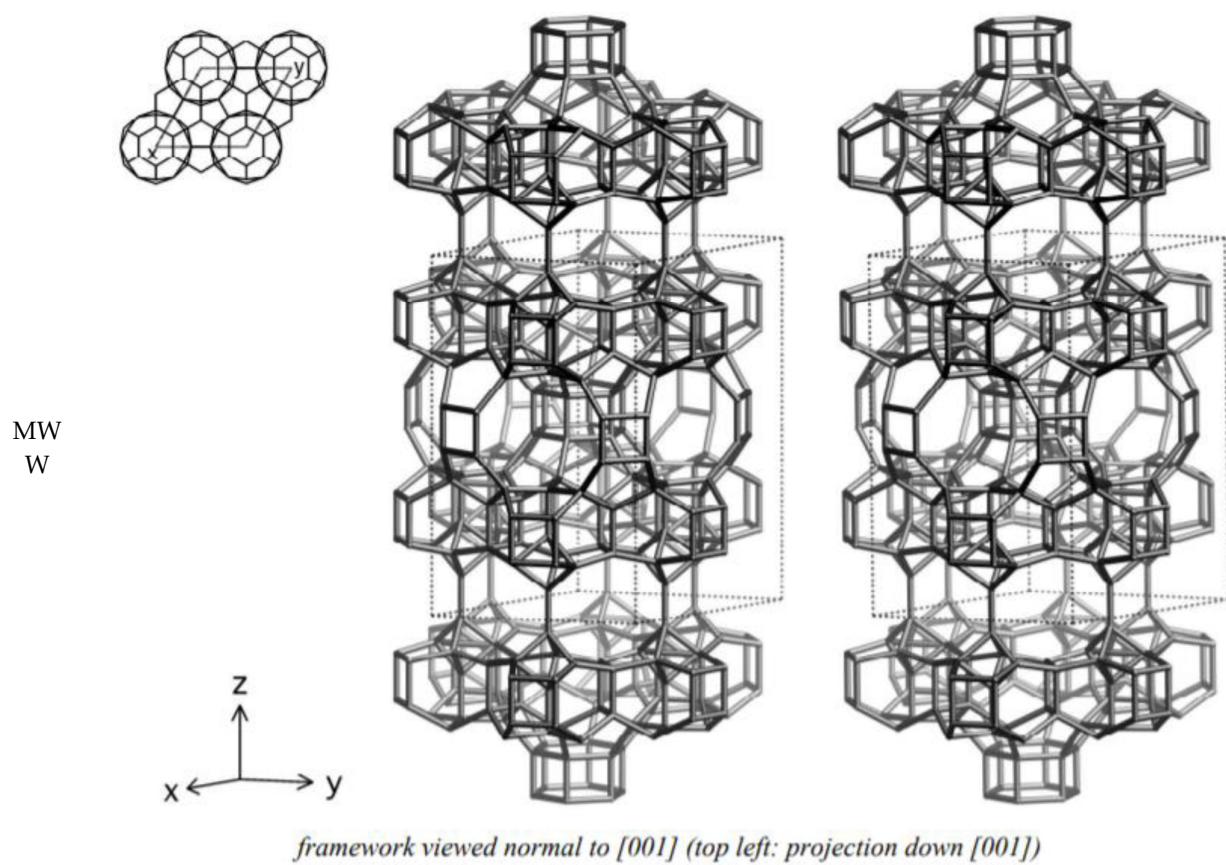

**Figure S2.** Framework types of selected zeolites. Zeolites X and Y mentioned in the manuscript have FAU framework type, zeolite A – LTA, zeolite ZSM5 – MFI, zeolite MCM-21 – MWW.



The image displays the chemical structures of seven organochlorine pesticides, arranged around a central orange circle containing the text "Organochlorine pesticides".

- Pentachlorophenol**: A benzene ring with a hydroxyl group (-OH) and five chlorine atoms (-Cl) at the 2, 3, 4, 5, and 6 positions.
- DDT**: 1,1,1-tris(4-chlorophenyl)ethane. It consists of a central carbon atom bonded to three 4-chlorophenyl groups and one hydrogen atom.
- Heptachlor**: A bicyclic structure with seven chlorine atoms.
- Methoxychlor**: 1,1,1-tris(4-methoxyphenyl)ethane. It consists of a central carbon atom bonded to three 4-methoxyphenyl groups and one hydrogen atom.
- Dieldrin**: A complex polycyclic structure with eight chlorine atoms.
- Endosulfan**: A bicyclic structure with six chlorine atoms and a sulfonate group (-SO<sub>2</sub>-O-).
- Aldrin**: A bicyclic structure with six chlorine atoms.

**Figure S3.** Structures of organochlorine pesticides.

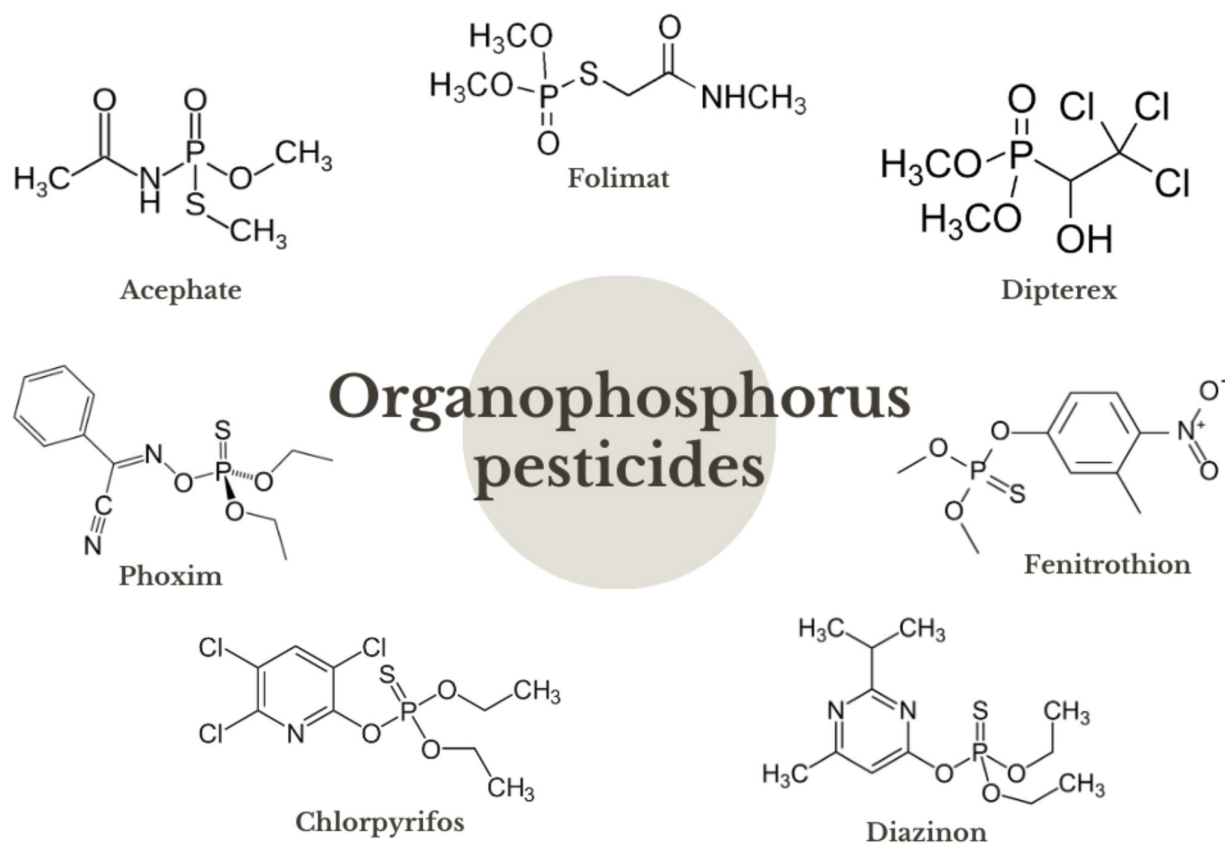

**Figure S4.** Structures of organophosphorus pesticides.

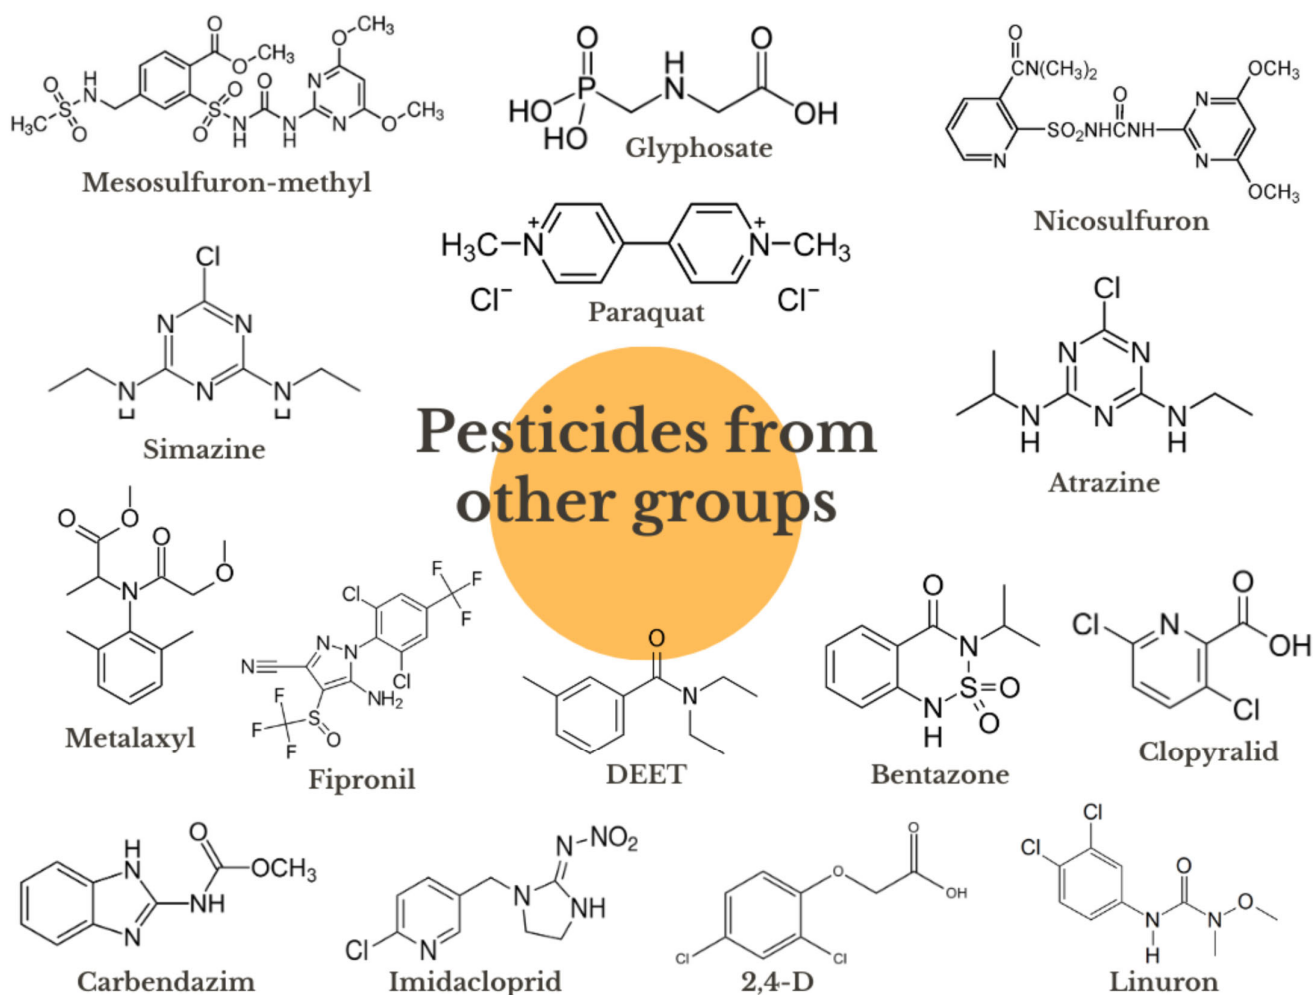

Figure S5. Structures of pesticides from other groups.

**Table S1.** Selected adsorption capacities and other parameters for the removal of organochlorine pesticides by mesoporous silica materials.

| Adsorbate         | Adsorbent                             | Adsorption |        | Conditions                         |           |             |                     |                                      | Reference |
|-------------------|---------------------------------------|------------|--------|------------------------------------|-----------|-------------|---------------------|--------------------------------------|-----------|
|                   |                                       | (%)        | (mg/g) | Conc. range <sup>1</sup><br>(mg/L) | pH<br>(-) | Time<br>(h) | Temperature<br>(°C) | Adsorb. dosage <sup>2</sup><br>(g/L) |           |
| DDT               | SBA-15                                | 99         | 5.66*  | 8                                  |           | 12          |                     |                                      |           |
|                   | MCM-41                                | 92         | 0.68*  |                                    |           |             |                     |                                      |           |
|                   | MCM-48                                | 89.5       | 0.66*  | 1.03                               | -         | 36          | -                   | 1.4                                  | [100]     |
|                   | HMS                                   | 93.5       | 0.69*  |                                    |           |             |                     |                                      |           |
| DDT               |                                       | 98         | -      |                                    |           |             |                     |                                      |           |
| DDD               | SBA-15                                | 99         | -      |                                    |           |             |                     |                                      |           |
| DDE               |                                       | 96         | -      |                                    |           |             |                     |                                      |           |
| DDT               |                                       | 94–97      | -      | 4                                  | -         | 12          | 20                  | -                                    | [99]      |
| DDD               | Fe-SBA-15                             | 98–99      | -      |                                    |           |             |                     |                                      |           |
| DDE               |                                       | 98         | -      |                                    |           |             |                     |                                      |           |
| Pentachlorophenol | SBA-15                                | 5.8        | 5.79   |                                    |           |             |                     |                                      |           |
|                   | SA-SBA-15                             | 32.8       | 3.28   | 10                                 | 6.5       | 12          | 25                  | 4                                    | [51]      |
|                   | ST-SBA-15                             | 24.6       | 2.46   |                                    |           |             |                     |                                      |           |
| Pentachlorophenol | (Na)Al-MCM-41                         | 37.71*     | 33     |                                    |           |             |                     |                                      |           |
|                   | (K)Al-MCM-41                          | 40*        | 35     |                                    |           |             |                     |                                      |           |
|                   | (Cu)Al-MCM-41                         | 53.71*     | 47     | 700                                | 6         | 4           | 30                  | 8                                    | [97]      |
|                   | (Cr)Al-MCM-41                         | 53.71*     | 47     |                                    |           |             |                     |                                      |           |
| Heptachlor        | HMS                                   | 52.56*     | 0.027  | 0.075                              |           |             |                     |                                      |           |
| Endosulfan        |                                       | 85.51*     | 0.041  | 0.070                              |           |             |                     |                                      |           |
| Aldrin            |                                       | 60.65*     | 0.027  | 0.065                              |           |             |                     |                                      |           |
| Dieldrin          |                                       | 41.15*     | 0.031  | 0.110                              |           |             |                     |                                      |           |
| DDT               |                                       | 63.71*     | 0.024  | 0.055                              |           |             |                     | 1.46                                 |           |
| DDD               |                                       | 61.18*     | 0.044  | 0.105                              |           |             |                     |                                      |           |
| DDE               |                                       | 75.43*     | 0.031  | 0.060                              |           |             |                     |                                      |           |
| Methoxychlor      |                                       | 57.28*     | 0.051  | 0.130                              |           |             |                     |                                      |           |
| Heptachlor        | CD-HMS-2%                             | 66.27*     | 0.035  | 0.075                              |           | 24          | 4                   |                                      | [98]      |
| Endosulfan        |                                       | 42.60*     | 0.021  | 0.070                              |           |             |                     |                                      |           |
| Aldrin            |                                       | 69.91*     | 0.032  | 0.065                              |           |             |                     |                                      |           |
| Dieldrin          |                                       | 54.22*     | 0.042  | 0.110                              |           |             |                     |                                      |           |
| DDT               |                                       | 64.55*     | 0.025  | 0.055                              |           |             |                     | 1.42                                 |           |
| DDD               |                                       | 71.68*     | 0.053  | 0.105                              |           |             |                     |                                      |           |
| DDE               |                                       | 82.83*     | 0.035  | 0.060                              |           |             |                     |                                      |           |
| Methoxychlor      |                                       | 68.82*     | 0.063  | 0.130                              |           |             |                     |                                      |           |
| DDT               | HMS                                   | 37.77*     | 2.77   |                                    |           |             |                     |                                      |           |
|                   | Fe <sub>3</sub> O <sub>4</sub> @HMS-2 | 102.27*    | 7.5    | 2.2                                | -         | 1           | room                | 0.3                                  | [101]     |

\*—values calculated based on the data published in the cited articles; <sup>1</sup>—concentration range; <sup>2</sup>—adsorbent dosage.



**Table S2.** Selected adsorption capacities and other parameters for the removal of organophosphorus pesticides by mesoporous silica materials.

[illegible]

|              |            |     |          |     |   |    |      |   |       |
|--------------|------------|-----|----------|-----|---|----|------|---|-------|
| Acephate     |            | 0   | 0*       |     |   |    |      |   |       |
| Folimat      |            | 1.6 | 0.00016* |     |   |    |      |   |       |
| Phoxim       | MCM-48     | 4.4 | 0.00044* |     |   |    |      |   |       |
| Chlorpyrifos |            | 4.9 | 0.00049* |     |   |    |      |   |       |
| Dipterex     |            | 10  | 0.0001*  |     |   |    |      |   |       |
| Diazinon     | MCM-41     | 80  | 256*     | 320 |   |    |      | 1 |       |
| Fenitrothion |            | 100 | 56*      | 280 | - | 24 | room | 5 | [103] |
| Diazinon     | MCM-48     | 75  | 240*     | 320 |   |    |      | 1 |       |
| Fenitrothion |            | 67  | 37.52*   | 280 |   |    |      | 5 |       |
| Diazinon     | MCM-41     | 55  | 9        |     |   |    |      |   |       |
|              | MPS-MCM-41 | 68  | 11       | 50  | 9 | 1  | 25   | 3 | [102] |

\*— values calculated based on the data published in the cited articles; <sup>1</sup>— concentration range; <sup>2</sup>— adsorbent dosage.



|          |                  |        |       |        |     |   |    |      |       |
|----------|------------------|--------|-------|--------|-----|---|----|------|-------|
|          | Cu-MCM-41        | 7*     | 140   |        |     |   |    |      |       |
|          | Zn-MCM-41        | 7.55*  | 151   |        |     |   |    |      |       |
|          | MCM-41           | 0*     | 0     |        |     |   |    |      |       |
| 2,4-D    | 0.24APTES-MCM-41 | 75*    | 132   | 440    | 4.5 | 6 | 25 | 2.5  | [105] |
| Paraquat | HMS              | 54.08* | 23.81 | 275.16 | 9.5 | 1 | 25 | 6.25 | [116] |

\*—values calculated based on the data published in the cited articles; 1—concentration range; 2—adsorbent dosage.

**Table S4.** Selected adsorption capacities and other parameters for the removal organochlorine and organophosphorus pesticides by synthetic zeolites.

| Adsorbate            | Adsorbent        | Adsorption |          | Conditions                         |           |             |                     | Adsorb. dos-<br>age <sup>2</sup><br>(g/L) | Reference |
|----------------------|------------------|------------|----------|------------------------------------|-----------|-------------|---------------------|-------------------------------------------|-----------|
|                      |                  | (%)        | (mg/g)   | Conc. range <sup>1</sup><br>(mg/L) | pH<br>(-) | Time<br>(h) | Temperature<br>(°C) |                                           |           |
| $\alpha$ -endosulfan | HY(40)           | -          | 775      | 30                                 | -         | 1           | room                | -                                         | [121]     |
|                      | HBEA (Cal)       | -          | 360      |                                    |           |             |                     |                                           |           |
|                      | St700(3)         | -          | 650      |                                    |           |             |                     |                                           |           |
| Acephate             | NaY              | 7.9        | 0.00079* | 0.1                                | 7         | 12          | room                | 10                                        | [104]     |
| Folimat              |                  | 3.4        | 0.00034* |                                    |           |             |                     |                                           |           |
| Phoxim               |                  | 5.6        | 0.00056* |                                    |           |             |                     |                                           |           |
| Chlorpyrifos         |                  | 11.0       | 0.0011*  |                                    |           |             |                     |                                           |           |
| Dipterex             |                  | 15.1       | 0.00151* |                                    |           |             |                     |                                           |           |
| Acephate             | FeNaY (imp-3.5%) | 7.6        | 0.00076* |                                    |           |             |                     |                                           |           |
| Folimat              |                  | 17.9       | 0.00179* |                                    |           |             |                     |                                           |           |
| Phoxim               |                  | 31.8       | 0.00318* |                                    |           |             |                     |                                           |           |
| Chlorpyrifos         |                  | 31.4       | 0.00314* |                                    |           |             |                     |                                           |           |
| Dipterex             |                  | 93.4       | 0.00934* |                                    |           |             |                     |                                           |           |
| Acephate             | FeY (ex-8.6%)    | 20.6       | 0.00206* |                                    |           |             |                     |                                           |           |
| Folimat              |                  | 18.3       | 0.00183* |                                    |           |             |                     |                                           |           |
| Phoxim               |                  | 19.1       | 0.00191* |                                    |           |             |                     |                                           |           |
| Chlorpyrifos         |                  | 19.5       | 0.00195* |                                    |           |             |                     |                                           |           |
| Dipterex             |                  | 31.9       | 0.00319* |                                    |           |             |                     |                                           |           |
| Acephate             | NTY              | 4.0        | 0.0004*  |                                    |           |             |                     |                                           |           |
| Folimat              |                  | 1.9        | 0.00019* |                                    |           |             |                     |                                           |           |
| Phoxim               |                  | 10.7       | 0.00107* |                                    |           |             |                     |                                           |           |
| Chlorpyrifos         |                  | 27.0       | 0.0027*  |                                    |           |             |                     |                                           |           |
| Dipterex             |                  | 13.3       | 0.00133* |                                    |           |             |                     |                                           |           |
| Acephate             | MCM-22           | 8.0        | 0.0008*  |                                    |           |             |                     |                                           |           |
| Folimat              |                  | 3.9        | 0.00039* |                                    |           |             |                     |                                           |           |
| Phoxim               |                  | 20.7       | 0.00207* |                                    |           |             |                     |                                           |           |
| Chlorpyrifos         |                  | 30.8       | 0.00308* |                                    |           |             |                     |                                           |           |
| Dipterex             |                  | 16.7       | 0.00167* |                                    |           |             |                     |                                           |           |

\*— values calculated based on the data published in the cited articles; <sup>1</sup>— concentration range; <sup>2</sup>— adsorbent dosage.

**Table S5.** Selected adsorption capacities and other parameters for the removal of different groups of pesticides by synthetic zeolites.

| Adsorbate    | Adsorbent        | Adsorption |          | Conditions                         |           |             |                     | Adsorb. dos-<br>age <sup>2</sup><br>(g/L) | Reference |
|--------------|------------------|------------|----------|------------------------------------|-----------|-------------|---------------------|-------------------------------------------|-----------|
|              |                  |            |          | Conc. range <sup>1</sup><br>(mg/L) | pH<br>(-) | Time<br>(h) | Temperature<br>(°C) |                                           |           |
| 2,4-D        | HY               | 3.2*       |          |                                    |           |             |                     |                                           |           |
|              | 10HHY            |            |          |                                    |           |             |                     |                                           |           |
|              | 10SHY            |            |          |                                    |           |             |                     |                                           |           |
|              | NaY              |            |          |                                    | 3         |             |                     |                                           |           |
|              | 10HNaY           |            |          | 250                                |           | 24          | 28                  | 1                                         | [106]     |
|              | 10SNaY           |            |          |                                    |           |             |                     |                                           |           |
| Paraquat     | HY               |            |          |                                    |           |             |                     |                                           |           |
|              | 30SHY            |            |          |                                    |           |             |                     |                                           |           |
|              | NaY              |            |          |                                    | 11        |             |                     |                                           |           |
|              | 30SNaY           |            |          |                                    |           |             |                     |                                           |           |
| Paraquat     | NaY              | 64.24*     | 185      | 720                                | -         | 1           | room                | 2.5                                       | [115]     |
|              | NaBEA            | 42.36*     | 122      |                                    |           |             |                     |                                           |           |
| Carbendazim  | NaY              | 4.5        | 0.00045* |                                    |           |             |                     |                                           |           |
| Imidacloprid |                  | 0          | 0*       |                                    |           |             |                     |                                           |           |
| Carbendazim  | FaNaY (imp-3.5%) | 12.0       | 0.0012*  |                                    |           |             |                     |                                           |           |
| Imidacloprid |                  | 7.9        | 0.00079* |                                    |           |             |                     |                                           |           |
| Carbendazim  | FeY (ex-8.6%)    | 20.2       | 0.00202* | 0.1                                | 7         | 12          | room                | 10                                        | [104]     |
| Imidacloprid |                  | 21.5       | 0.00215* |                                    |           |             |                     |                                           |           |
| Carbendazim  | NTY              | 74.9       | 0.00749* |                                    |           |             |                     |                                           |           |
| Imidacloprid |                  | 13.3       | 0.00133* |                                    |           |             |                     |                                           |           |
| Carbendazim  | MCM-22#          | 100        | 0.01*    |                                    |           |             |                     |                                           |           |
| Imidacloprid |                  | 1.9        | 0.00019* |                                    |           |             |                     |                                           |           |
| Paraquat     | NAX              | 41.67*     | 120      | 720                                | -         | 1           | room                | 2.5                                       | [114]     |
| Fipronil     | H-ZSM-5          | 30         | 270*     |                                    |           |             |                     |                                           |           |
|              | Ce25ZSM-5        | 79.6       | 716.4*   | 900                                | 2         | 2           | 25                  | 1                                         | [122]     |
|              | Ce30ZSM-5        | 76.7       | 690.3*   |                                    |           |             |                     |                                           |           |
| Bentazone    | beta (BEA)-1     | 69.6       | 1.39*    |                                    |           |             |                     |                                           |           |
| Clopyralid   |                  | 9.1        | 0.18*    |                                    |           |             |                     |                                           |           |
| Imidacloprid |                  | 98.8       | 1.98*    |                                    |           |             |                     |                                           |           |
| Metalaxyl-m  |                  | 42.0       | 0.84*    |                                    |           |             |                     |                                           |           |
| Bentazone    | Y (FAU)-7        | 100        | 2        | 10                                 | -         | -           | 22                  | 5                                         | [120]     |
| Clopyralid   |                  | 10.8       | 0.22*    |                                    |           |             |                     |                                           |           |
| Imidacloprid |                  | 99.7       | 1.99*    |                                    |           |             |                     |                                           |           |
| Metalaxyl-m  |                  | 99.3       | 1.99*    |                                    |           |             |                     |                                           |           |
| Bentazone    | 4A (LTA)-11      | 0.2        | 0.004*   |                                    |           |             |                     |                                           |           |



|              |                    |       |       |     |    |    |    |   |       |
|--------------|--------------------|-------|-------|-----|----|----|----|---|-------|
| Clopyralid   |                    | 0     | 0*    |     |    |    |    |   |       |
| Imidacloprid |                    | 0     | 0*    |     |    |    |    |   |       |
| Metalaxyl-m  |                    | 64.6  | 1.29* |     |    |    |    |   |       |
| Bentazone    |                    | 21.7  | 0.43* |     |    |    |    |   |       |
| Clopyralid   | ZSM-5/silicalite-1 | 3.9   | 0.08* |     |    |    |    |   |       |
| Imidacloprid | (MFI)-14           | 86.1  | 1.72* |     |    |    |    |   |       |
| Metalaxyl-m  |                    | 36.9  | 0.74* |     |    |    |    |   |       |
| Paraquat     | H_LTL              | 10.4* | 26    | 500 | 11 | 24 | 30 | 2 | [117] |
|              | K_LTL#             | 66.8* | 167   |     |    |    |    |   |       |

\*—values calculated based on the data published in the cited articles; <sup>1</sup>—concentration range; <sup>2</sup>—adsorbent dosage.



|                     |                             |        |       |    |   |    |    |   |       |
|---------------------|-----------------------------|--------|-------|----|---|----|----|---|-------|
|                     | ZSM-5/silicalite-1 (MFI)-14 | 86.1   | 1.72* |    |   |    |    |   |       |
| Mesosulfuron-methyl | HZSM-5                      | 36*    | 3.6   |    |   |    |    |   |       |
|                     | HZSM-5-60                   | 41*    | 4.1   |    |   |    |    |   |       |
|                     | HZSM-5-60-Ac                | 44*    | 4.4   | 20 | 6 | 72 | 25 | 2 | [108] |
|                     | HMOR                        | 0*     | 0     |    |   |    |    |   |       |
|                     | HMOR-70                     | 29*    | 2.9   |    |   |    |    |   |       |
|                     | HMOR-70-Ac                  | 41*    | 4.1   |    |   |    |    |   |       |
| Nicosulfuron        | Z30                         | 17.33* | 6.5   |    |   |    |    |   |       |
|                     | Z30K/PW-D                   | 22.66* | 8.5   |    |   |    |    |   |       |
|                     | Z30PW/K-C                   | 28*    | 10.5  | 75 | 5 | 24 | 23 | 2 | [132] |
|                     | Z30PW/K-D                   | 32*    | 12    |    |   |    |    |   |       |
|                     | Z30K/PW-C                   | 76*    | 28.5  |    |   |    |    |   |       |

\*—values calculated based on the data published in the cited articles; <sup>1</sup>—concentration range; <sup>2</sup>—adsorbent dosage.

**Table S7.** Selected adsorption capacities and other parameters for the removal of glyphosate-based pesticides by synthetic zeolites.

| Adsorbate  | Adsorbent | Adsorption |      | Conditions                         |           |             |                     | Adsorb. dosage <sup>2</sup><br>(g/L) | Reference |
|------------|-----------|------------|------|------------------------------------|-----------|-------------|---------------------|--------------------------------------|-----------|
|            |           |            |      | Conc. range <sup>1</sup><br>(mg/L) | pH<br>(-) | Time<br>(h) | Temperature<br>(°C) |                                      |           |
| Glyphosate | BEA       | 4.31*      | 34.5 | 4000                               | -         | 24          | 23                  | 5                                    | [110]     |
|            | BKPW-2    | 7.11*      | 56.9 |                                    |           |             |                     |                                      |           |
|            | BKPW-3    | 7.73*      | 61.8 |                                    |           |             |                     |                                      |           |
|            | BKPW-2C   | 11.53*     | 92.2 |                                    |           |             |                     |                                      |           |
|            | BKPW-3C   | 10.18*     | 81.4 |                                    |           |             |                     |                                      |           |
| Glyphosate | HZSM-5    | 3.73*      | 14.9 | 4000                               | 1.7       | 2           | -                   | 10                                   | [111]     |
|            | PZ 1/1    | 6.70*      | 26.8 |                                    |           |             |                     |                                      |           |
|            | PZ 1/5    | 8.43*      | 33.7 |                                    |           |             |                     |                                      |           |
|            | PZ 1/10   | 4.63*      | 18.5 |                                    |           |             |                     |                                      |           |
|            | PZ 1/1 S  | 6.6*       | 26.4 |                                    |           |             |                     |                                      |           |
|            | PZ 1/1 d  | 15.48*     | 61.9 |                                    |           |             |                     |                                      |           |
| Glyphosate | PZ 1/1 Sd | 14.08*     | 56.3 | 100                                | 3         | 2           | -                   | 2                                    | [112]     |
|            | 4A        | 76*        | 38   |                                    |           |             |                     |                                      |           |
|            | Cu-4A     | 80*        | 40   |                                    |           |             |                     |                                      |           |

\*— values calculated based on the data published in the cited articles; <sup>1</sup>— concentration range; <sup>2</sup>— adsorbent dosage.#
